# Supplementary material for: Merging Historical Archives with Remote Sensing Data: A Methodology to Improve Rockfall Mitigation Strategy for Small Communities
Source: MDPI journal article supplement (doi:10.3390/land11111951), 2022-11-01
Supplement: s1 [file s1]

# Merging Historical Archives with Remote Sensing Data: A Methodology to Improve Rockfall Mitigation Strategy for Small Communities

## Supplementary Material

### Rock mass characterization.

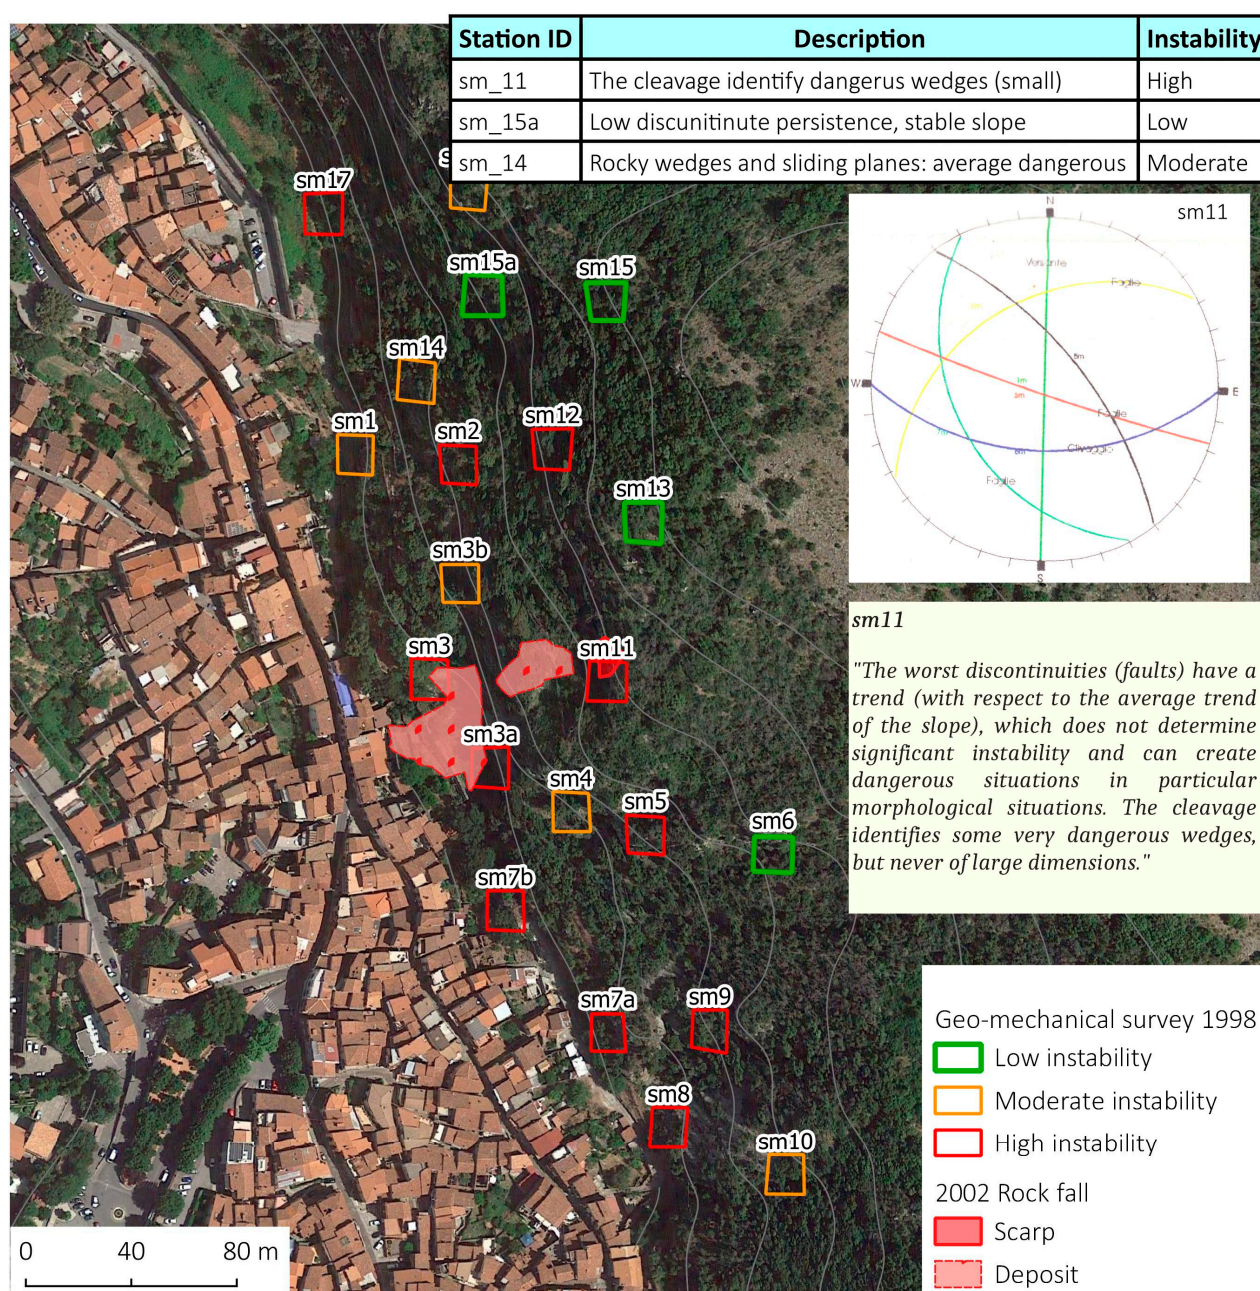

**Figure S1.** Lauria, map of potential rockfall/topple instability for each geomechanical station. A detail of station sm11, with description and discontinuities stereogram, nearby the January 2002 rock-fall. (translated and geocoded from the technical relation for Lauria municipality, 1998 unpublished [43])

**Table S1.** sm11: main parameter of measured discontinuities (from the technical relation for Lauria municipality, 1998 unpublished [43])

|          | DIP | DIP DIR | Aperture | Persistence |     |     |
|----------|-----|---------|----------|-------------|-----|-----|
| Type     | (°) | (°)     | mm       | m           | JRC | JCS |
| cleavage | 50  | 200     | 5        | 4           | 8   | 130 |
| cleavage | 40  | 290     | 1        | 10          | 12  | 90  |
| cleavage | 50  | 50      | 0        | 2           | 15  | 55  |
| cleavage | 90  | 160     | 15       | 5           | 10  | 120 |
| cleavage | 90  | 120     | 1        |             | 16  |     |
| fault    | 70  | 100     | 25       | 30          | 10  | 120 |
| fault    | 55  | 90      | 0.5      | 15          | 9   | 135 |
| fault    | 50  | 40      | 1        | 5           | 12  |     |
| fault    | 90  | 60      | 12       | 5           | 10  | 140 |
| fault    | 80  | 310     | 5        | 5           | 8   |     |

**Table S2.** Description of some significant rock mass characterization stations (translated from the technical relation for Lauria municipality, 1998 unpublished [43])

| ID    | Instability Degree | Description                                                                                                                                                                                                                                                                                           |
|-------|--------------------|-------------------------------------------------------------------------------------------------------------------------------------------------------------------------------------------------------------------------------------------------------------------------------------------------------|
| sm11  | high               | The worst discontinuities (faults) have a trend (compared to the average slope trend), which does not determine significant instability and can create dangerous situations in particular morphological situations. The cleavage identifies some very dangerous wedges, but never of large dimensions |
| sm12  | high               | The presence of block sliding planes consisting of very persistent discontinuities (sliding along the layer) and wedges with very inclined intersection line, determine a very unstable structural situation                                                                                          |
| sm2   | high               | The rock mass has less inclined landslides than the slope (relatively persistent stratification) and sub-vertical fracturing planes and faults, which give rise to free blocks even of large dimensions: the situation is, therefore, of severe instability                                           |
| sm3   | high               | The formation of rocky wedges with even very inclined intersection lines determined by faults and block sliding surfaces, still consisting of faults, leads to a very dangerous instability                                                                                                           |
| sm5   | high               | Stratification in deep slope conditions and sub-vertical faults that isolate the blocks with a high degree of instability                                                                                                                                                                             |
| sm1   | average            | Moderate instability: the presence of two wedges with a moderate inclined intersection line formed by small persistent discontinuities; Toppling planes created by persistent faults with the same slope trend but plunging inside the slope                                                          |
| sm4   | average            | Presence of wedges and surfaces that can cause toppling determines a situation moderately predisposed to failure                                                                                                                                                                                      |
| sm15a | low                | The low persistence of the most frequent discontinuities and the overall scarp slope arrangement determine a stable structural arrangement                                                                                                                                                            |
| sm6   | low                | The slope has a sub-vertical EW trend, the presence of a wedge with a very inclined intersection line between fault surfaces and small persistent cleavage toppling planes, that do not create significant stability problems                                                                         |

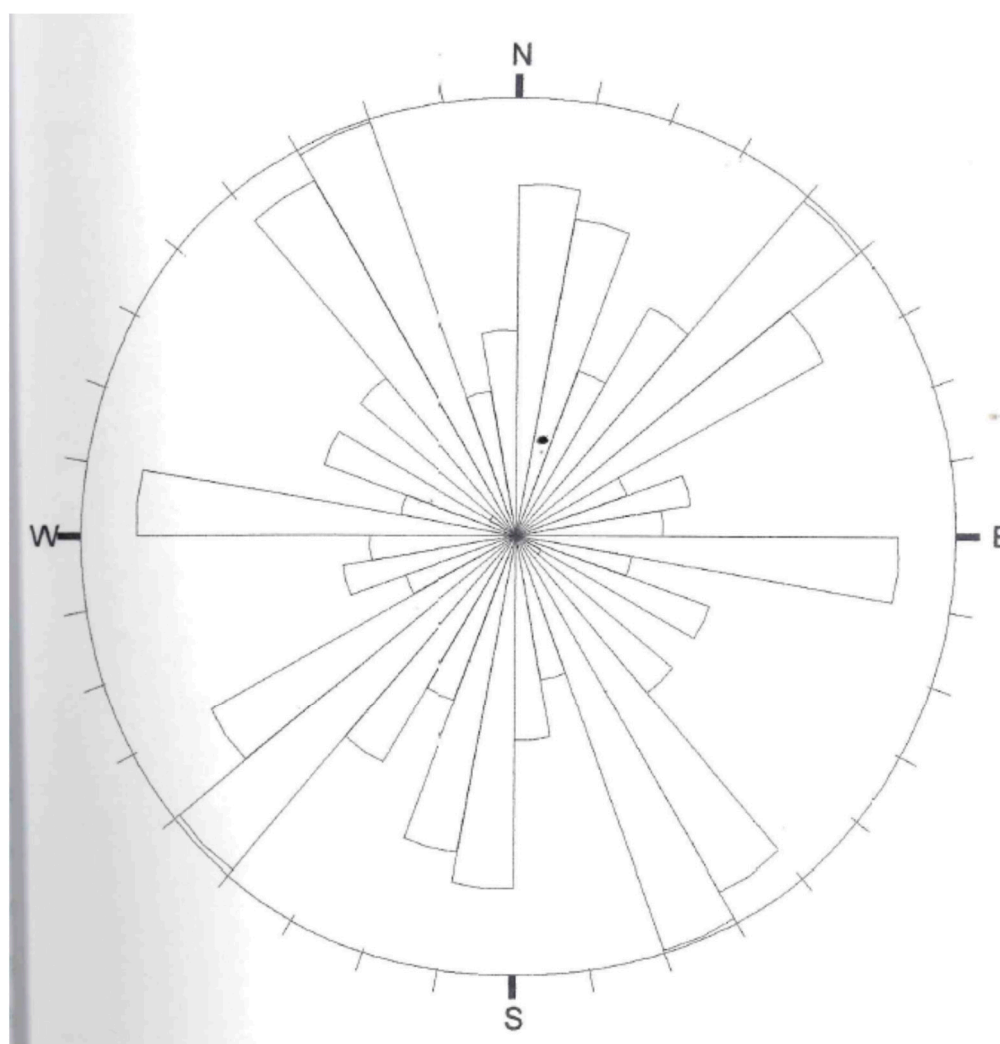

**Figure S2.** Original polar diagram of the average orientation of the discontinuity systems of the slope affected by rockfall (digitalized from the technical report for Lauria municipality, 1998 unpublished [43])
